# Supplementary material for: Dopamine dithiocarbamate functionalized silver nanoparticles as colorimetric sensors for the detection of cobalt ion
Source: Royal Society of Chemistry journal article supplement (doi:10.1039/c3ay26150f), 2013-01-01
Supplement: c3ay26150f.pdf [file c3ay26150f.pdf]

# Supporting Information of Dopamine dithiocarbamate functionalized silver nanoparticles as colorimetric sensors for the detection of cobalt ion

Vaibhavkumar N Mehtaa, Anil Kumar Mungarab and Suresh Kumar Kailasaa\*

<sup>a</sup>Applied Chemistry Department, S. V. National Institute of Technology, Surat-395 007, India

<sup>b</sup>Department of Nanomaterial Chemistry, Dongguk University, Gyeongju 780-714, South Korea

\*Corresponding author, Phone: +91-261-2201730; Fax: +91-261-2227334

E-mail: sureshkumarchem@gmail.com, skk@ashd.svnit.ac.in

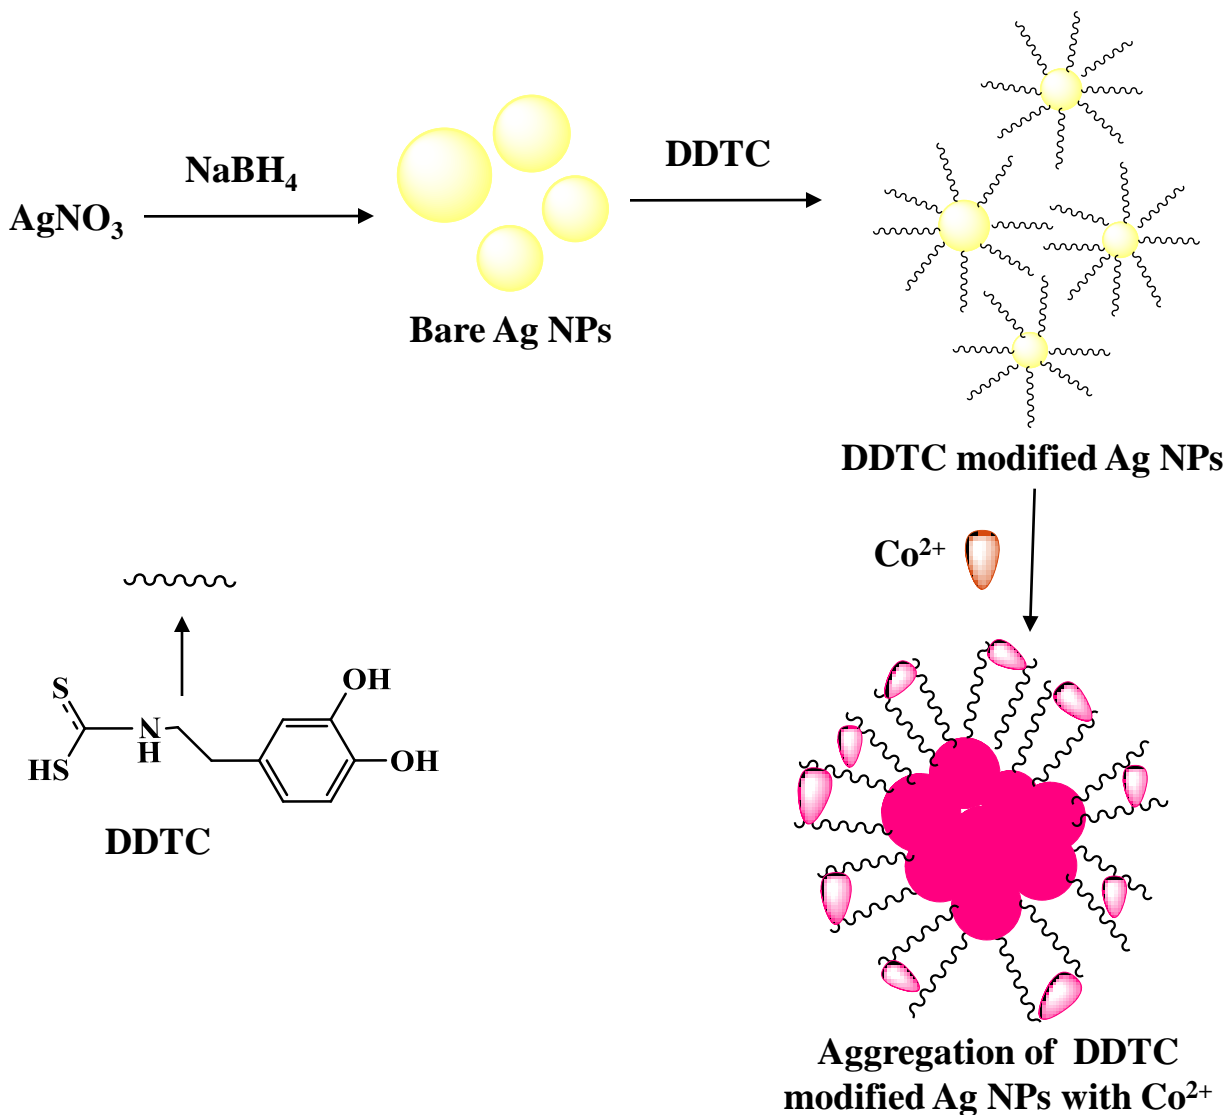

Figure S1. Schematic representation for detection of Co<sup>2+</sup> by DDTC modified Ag NPs

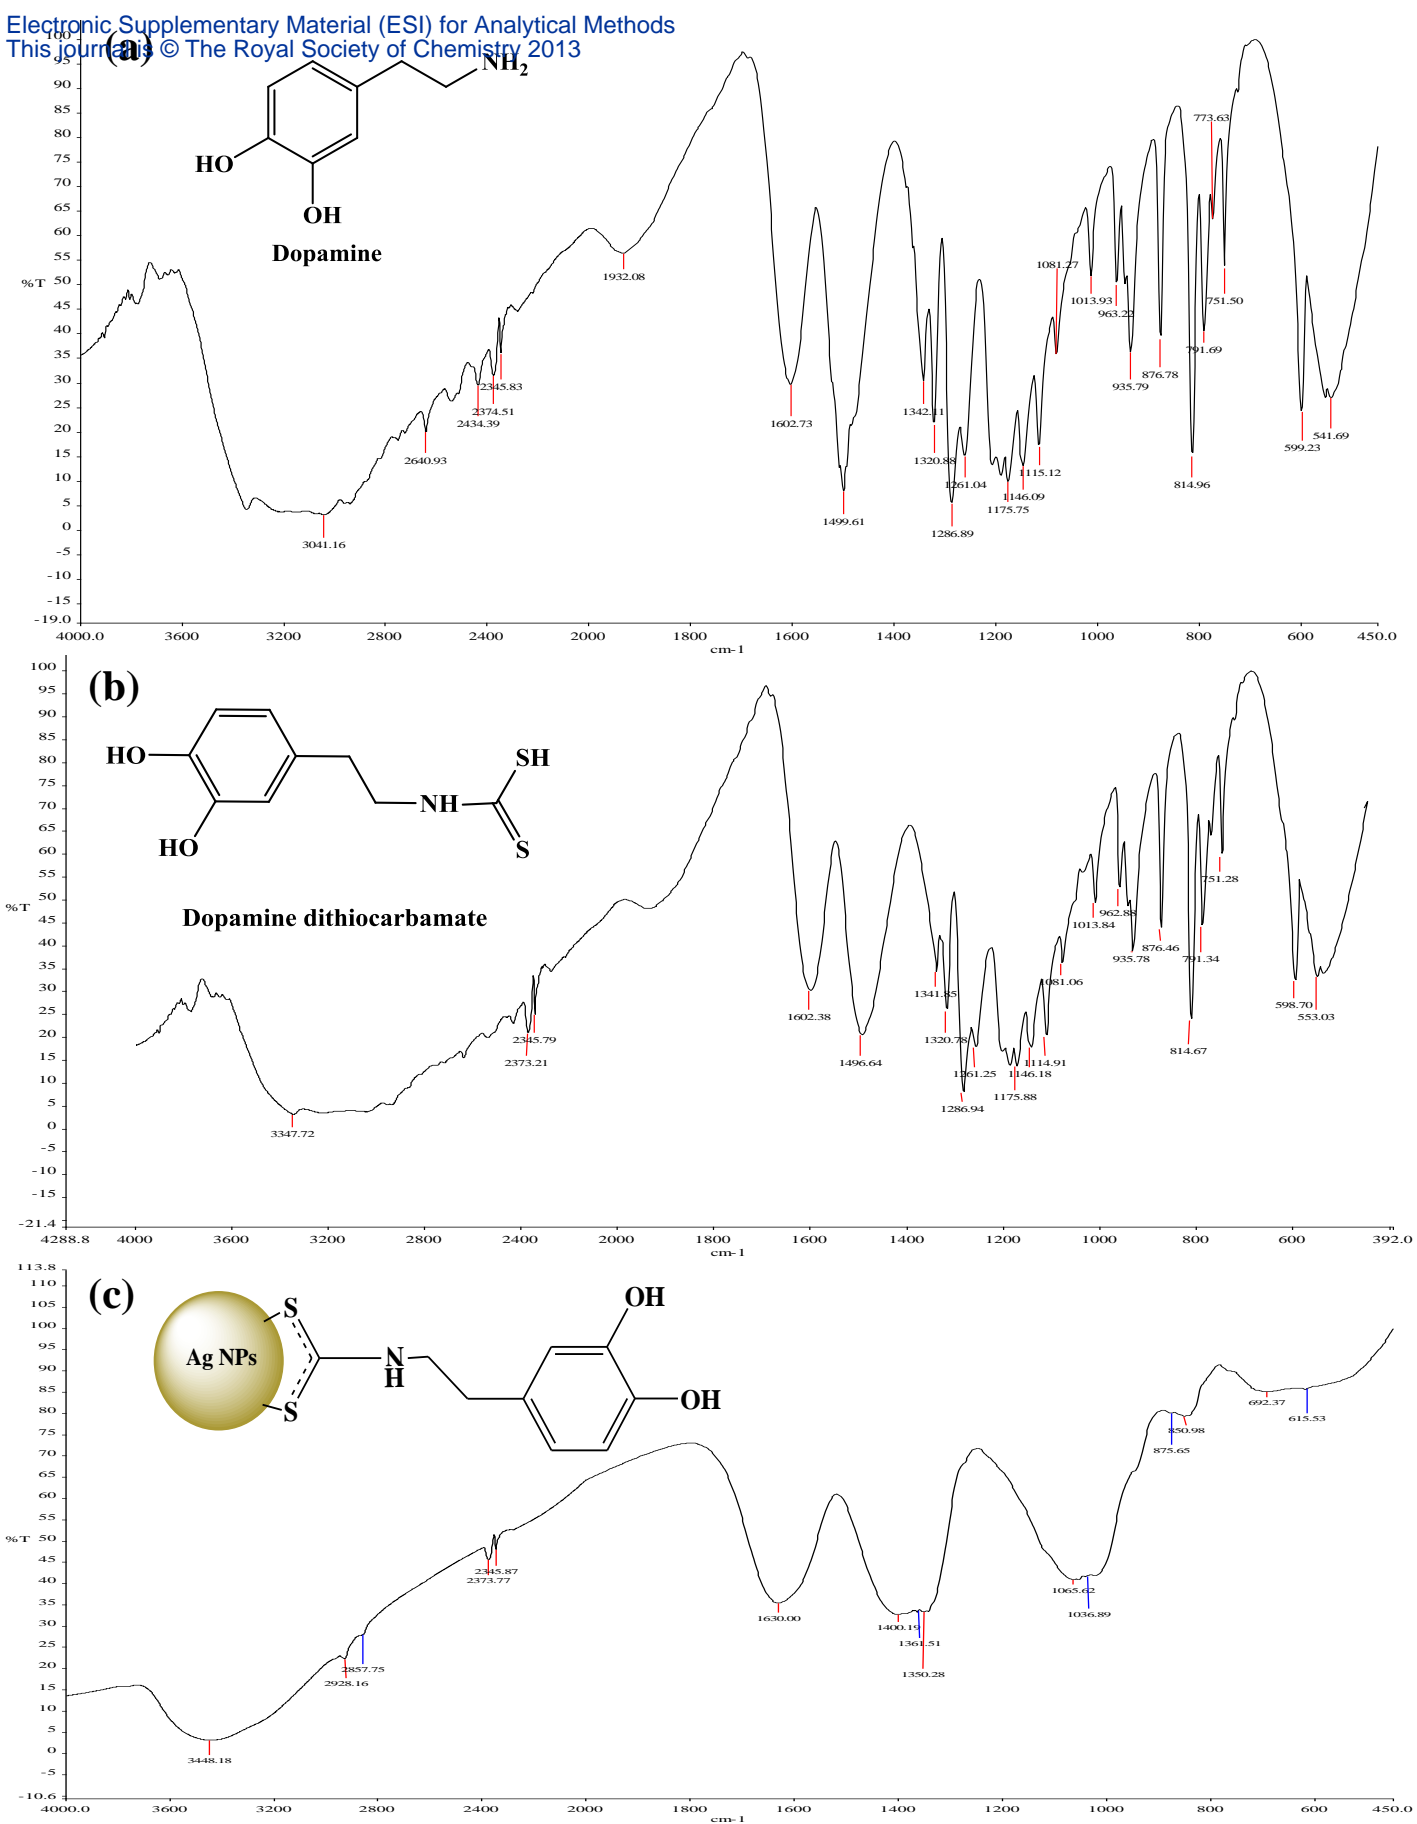

Figure S2. FT IR spectra of (a) pure dopamine (b) dopamine dithiocarbamate and (c) DDTC-Ag NPs.

Current Data Parameters  
 NAME May22-2012-Administrator  
 EXPNO 180  
 PROCNO 1  
 F2 - Acquisition Parameters  
 Date\_ 20120523  
 Time\_ 6.54  
 INSTRUM spect  
 PROBHD 5 mm PABBO BB-  
 PULPROG zgpg30  
 TD 65536  
 SOLVENT DMSO  
 NS 8  
 DS 2  
 SWH 12019.230 Hz  
 FIDRES 0.18339 Hz  
 AQ 2.7263477 sec  
 RG 62  
 EC 180.6  
 DE 41.600 usec  
 TE 297.2 K  
 D1 1.00000000 sec  
 TDO 1

===== CHANNEL f1 =====  
 NUC1 1H  
 P1 10.90 usec  
 PL1 -3.00 dB  
 SFO1 400.1324710 MHz  
 F2 - Processing parameters  
 SI 32768  
 SF 400.1299758 MHz  
 WDW EM  
 SSB 0  
 LB 0.30 Hz  
 GB 0  
 PC 1.00

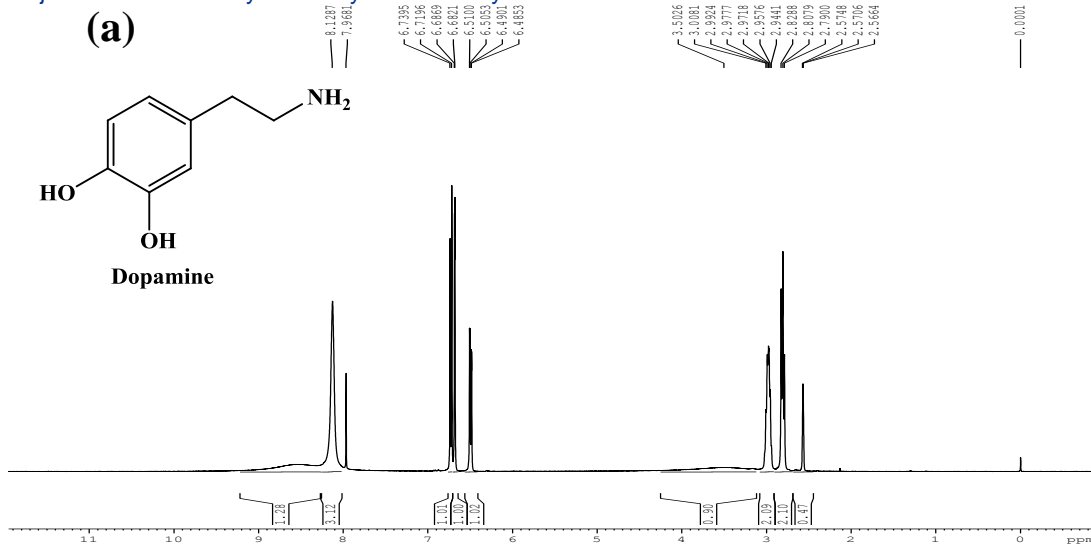

avtar saifpu@yahoo.co.in

BRUKER  
 AVANCE II 400 NMR  
 Spectrometer  
 SAIF  
 Panjab University  
 Chandigarh

Current Data Parameters  
 NAME May22-2012-Administrator  
 EXPNO 139  
 PROCNO 1  
 F2 - Acquisition Parameters  
 Date\_ 20120523  
 Time\_ 6.59  
 INSTRUM spect  
 PROBHD 5 mm PABBO BB-  
 PULPROG zgpg30  
 TD 65536  
 SOLVENT DMSO  
 NS 8  
 DS 2  
 SWH 12019.230 Hz  
 FIDRES 0.18339 Hz  
 AQ 2.7263477 sec  
 RG 62  
 EC 180.6  
 DE 41.600 usec  
 TE 297.2 K  
 D1 1.00000000 sec  
 TDO 1

===== CHANNEL f1 =====  
 NUC1 1H  
 P1 10.90 usec  
 PL1 -3.00 dB  
 SFO1 400.1324710 MHz  
 F2 - Processing parameters  
 SI 32768  
 SF 400.1299758 MHz  
 WDW EM  
 SSB 0  
 LB 0.30 Hz  
 GB 0  
 PC 1.00

SN-2

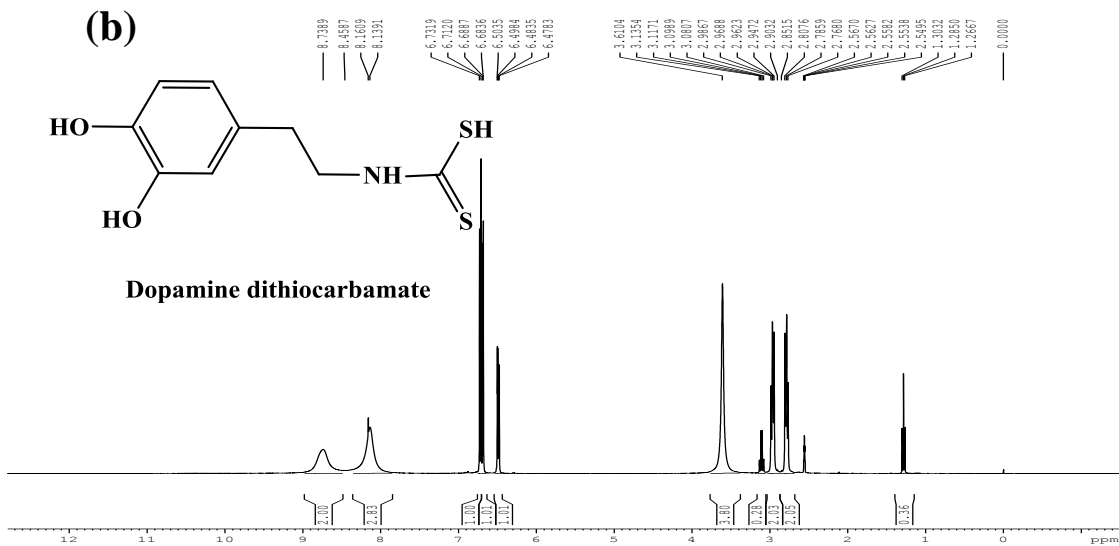

avtar saifpu@yahoo.co.in

BRUKER  
 AVANCE II 400 NMR  
 Spectrometer  
 SAIF  
 Panjab University  
 Chandigarh

Current Data Parameters  
 NAME May08-2012  
 EXPNO 331  
 PROCNO 1  
 F2 - Acquisition Parameters  
 Date\_ 20120509  
 Time\_ 10.28  
 INSTRUM spect  
 PROBHD 5 mm PABBO BB-  
 PULPROG zgpg30  
 TD 32768  
 SOLVENT DMSO  
 NS 8  
 DS 2  
 SWH 12019.230 Hz  
 FIDRES 0.366798 Hz  
 AQ 1.3531388 sec  
 RG 180.6  
 DE 41.600 usec  
 TE 296.3 K  
 D1 5.00000000 sec  
 d12 0.00002000 sec  
 TDO 1

===== CHANNEL f1 =====  
 NUC1 1H  
 P1 10.90 usec  
 PL1 -3.00 dB  
 SFO1 400.1318076 MHz  
 F2 - Processing parameters  
 SI 32768  
 SF 400.1300000 MHz  
 WDW EM  
 SSB 0  
 LB 0.00 Hz  
 GB 0  
 PC 1.00

SN

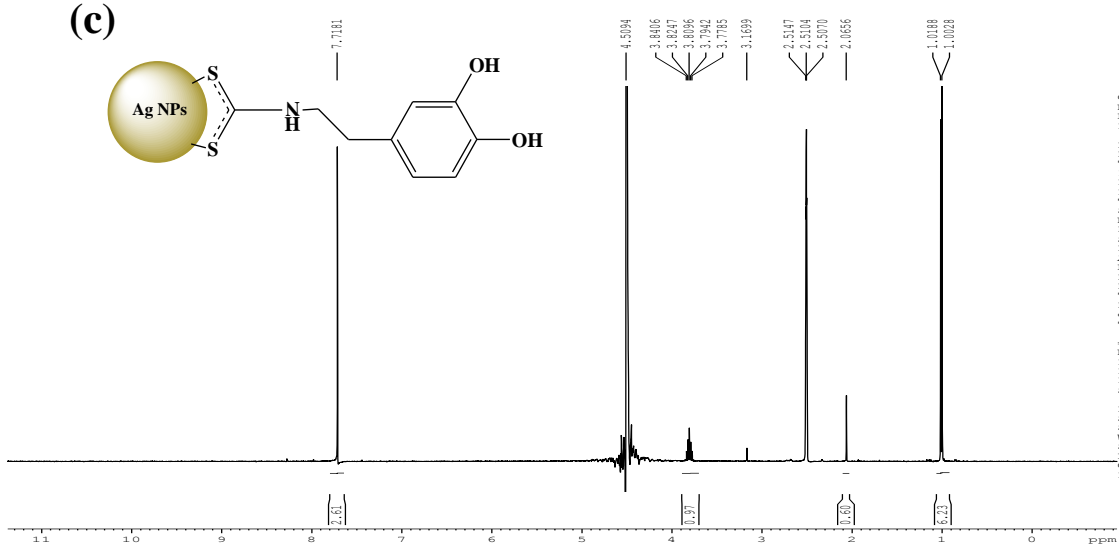

avtar saifpu@yahoo.co.in

**Figure S3.** <sup>1</sup>H NMR spectra of (a) pure dopamine (b) dopamine dithiocarbamate and (c) DDTc modified Ag NPs

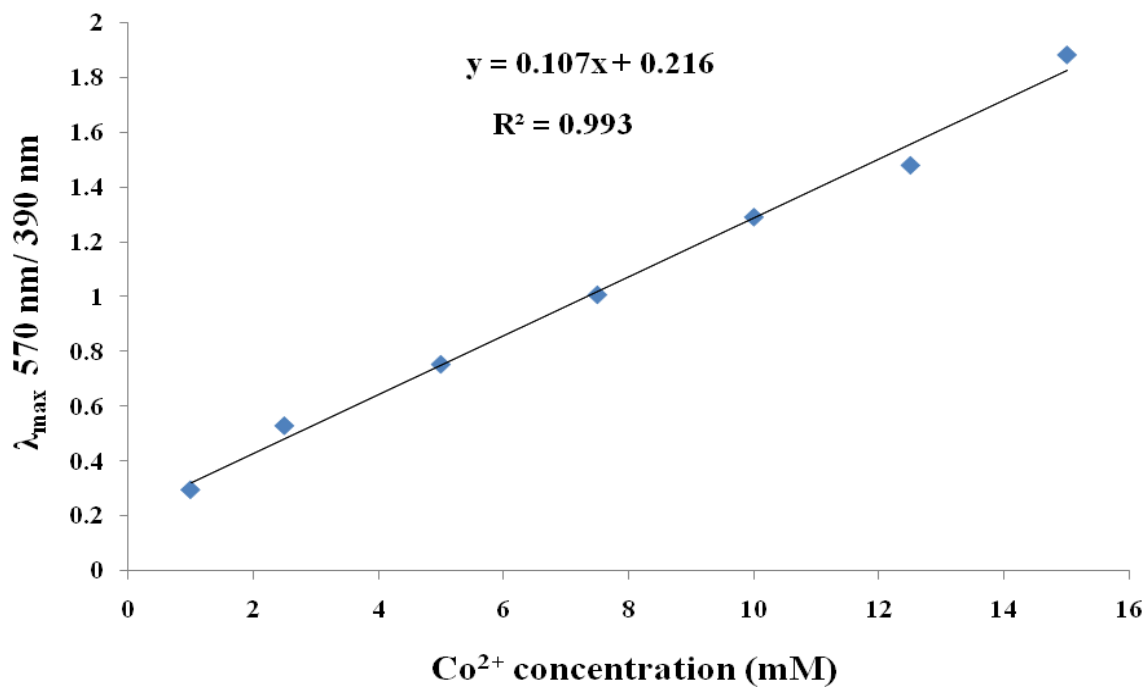

**Figure S4.** Calibration graph for the quantification of Co<sup>2+</sup> by using DDTC-Ag NPs as sensors
